# Supplementary material
Source: publisher figshare collection journal article supplement (https://rs.figshare.com/ndownloader/files/20114561)
Supplement: Supplementary file 1 [file 20114561]

## Sheet: RowData 2.1 Field
Table Row Data 2.1: Gene expression in Crassostrea gigas gills into the wild (Eyrac, Arcachon Bay, France at 44.66°N), expressed as relative expression. (A) Individual data (B) Mean ± Standard Error data. Hours are expressed in local time (UTC +1).
A																B
Days	Hours	Samples	Clock	Bmal	Per	Tim1	Cry2	Cry1	Ror	Rev-erb	Hiomt-like	Rhodopsin-like1	Rhodopsin-like2	Rhodopsin-like3		Days	Hours	Clock		Bmal		Per		Tim1		Cry2		Cry1		Ror		Rev-erb		Hiomt-like		Rhodopsin-like1		Rhodopsin-like2		Rhodopsin-like3
2018-03-14	18h48	t1-1	0.0133224	0.000700173	0.0056993	0.00280069	0.00253289	0.0024213	0.00439476	0.00301213	0.0209777	0.000370048	7.35967e-05	0.000898621				Mean	SE	Mean	SE	Mean	SE	Mean	SE	Mean	SE	Mean	SE	Mean	SE	Mean	SE	Mean	SE	Mean	SE	Mean	SE	Mean	SE
		t1-2	0.0123873	0.00103942	0.00808801	0.00496153	0.00999207	0.00487629	0.00333061	0.00909948	0.0472023	0.000953156	0.000287331	0.000997082		2018-03-14	18h48	0.0106127	0.00205996	0.00108548	7.92528e-05	0.00737745	0.000571935	0.00682663	0.00130627	0.00696237	0.000958812	0.00442777	0.000634034	0.00252264	0.000717038	0.00555852	0.000827592	0.0439779	0.00778609	0.000525675	0.000102514	0.000201652	4.59889e-05	0.000593614	0.000119365
		t1-3	0.00723897	0.00102511	0.00579892	0.00479252	0.00517222	0.00272411	9.85987e-06	0.00293994	0.0252951	0.000240779	0.000188258	0.000179342		2018-03-14	21h54	0.00988211	0.00145909	0.0012708	0.000127177	0.00578459	0.000487075	0.00658755	0.000943848	0.00678499	0.000966932	0.0036607	0.000357345	0.00403081	0.00110673	0.0042475	0.000360193	0.0359559	0.00489582	0.00040871	0.000108708	0.000104684	2.08774e-05	0.000539101	0.000238169
		t1-4	0.0165159	0.00124901	0.00945308	0.00625836	0.00728932	0.00699238	0.00247218	0.00482585	0.0463914	0.000423603	9.81263e-05	0.000211801		2018-03-15	1h00	0.0078145	0.0011128	0.00152306	9.91367e-05	0.00522695	0.000857759	0.00508619	0.00152583	0.00539015	0.00098013	0.0036879	0.000634651	0.0015651	0.00060781	0.00395432	0.000722008	0.0309775	0.00605094	0.000448775	9.58452e-05	0.000161027	3.3981e-05	0.000214623	4.44399e-05
		t1-5	0.0110869	0.00136205	0.00604518	0.0134151	0.00759887	0.00606616	0.00484261	0.00628009	0.0454366	0.000377823	9.38034e-05	0.000512557		2018-03-15	4h06	0.0128585	0.00170427	0.00121796	0.000145244	0.00671112	0.00082636	0.00732469	0.0013061	0.00551592	0.000651552	0.00422808	0.000454325	0.00303657	0.000827136	0.00547288	0.000477481	0.0355946	0.00461958	0.000738678	0.000351261	0.000287536	9.07746e-05	0.000574164	0.000354317
		t1-6	4.08303e-05	0.00116134	0.00860863	0.00670754	0.00673083	0.00411469	0.00248076	0.00587987	0.0383402	0.000865007	0.000393868	0.000724865		2017-03-15	7h12	0.0106357	0.00125049	0.00134469	0.000292226	0.00681321	0.000618978	0.00751701	0.00118157	0.00589866	0.00150397	0.0040798	0.000579842	0.00390347	0.000881052	0.0048143	0.000627646	0.042219	0.00966387	0.000673178	0.000140817	0.000281177	0.000121751	0.000376376	6.13511e-05
		t1-7	0.013697	0.00106126	0.00794906	0.00885066	0.00942037	0.00379943	0.000127696	0.00687226	0.0842021	0.00044931	0.000276583	0.000631032		2018-03-15	10h18	0.00780507	0.000862114	0.00119559	4.97831e-05	0.00743318	0.000301636	0.00588175	0.00104246	0.00562384	0.000632104	0.00462152	0.000319543	0.00182581	0.000835801	0.0044487	0.00025235	0.0339347	0.00334721	0.000322216	3.95189e-05	0.000218785	9.1792e-05	0.000173946	3.89269e-05
2018-03-14	21h54	t2-1	0.0137445	0.00102511	0.0055627	0.00565993	0.00587987	0.00400218	0.00234695	0.00344806	0.0298733	0.000299532	6.0824e-05	0.000113502		2018-03-15	13h24	0.0116018	0.00139891	0.000970628	7.05836e-05	0.00771408	0.000331411	0.00742463	0.00095637	0.00838547	0.0007074	0.00527317	0.000776789	0.00309779	0.0012402	0.00466196	0.000410921	0.0368128	0.0046269	0.000462716	9.13477e-05	0.000231216	5.70885e-05	0.000315839	9.96787e-05
		t2-2	0.0158981	0.000966462	0.00778547	0.00999207	0.00831539	0.00511872	0.0066152	0.00544822	0.0505901	-	-	0.00182866		2018-03-15	16h30	0.0124102	0.00148621	0.00123079	7.13619e-05	0.00705628	0.00046643	0.00744012	0.000597098	0.00852666	0.000872458	0.00487122	0.000709922	0.00369807	0.00133886	0.00610235	0.000357471	0.0416919	0.0024232	0.000756242	0.000266281	0.000268336	0.000105535	0.000427339	0.000118817
		t2-3	0.00866851	0.00189314	0.00393342	0.00326206	0.00459729	0.00336541	0.00189314	0.00360696	0.0308198	0.000925487	4.37608e-05	0.000908013		2018-03-15	19h36	0.00964311	0.00161299	0.00107223	0.000135341	0.00738659	0.000432525	0.00651399	0.00093313	0.00591283	0.000917963	0.00443579	0.000387287	0.00327029	0.000946931	0.00501117	0.000393886	0.0413124	0.00517171	0.000684664	0.000174177	0.000286614	0.000110742	0.000455779	0.000167735
		t2-4	0.00641204	0.00101803	0.00541058	0.00428943	0.00431926	0.00243815	0.00195991	0.00331908	0.0185814	0.000158306	0.000140222	0.000113896		2018-03-15	22h42	0.00830952	0.00133378	0.00106483	0.000106562	0.0064195	0.000490721	0.00554518	0.000584713	0.00696083	0.00100073	0.00493007	0.000341179	0.00311709	0.00118837	0.00453861	0.000586624	0.0357127	0.00331594	0.000485912	6.02231e-05	0.000106861	2.16498e-05	0.000236301	6.37212e-05
		t2-5	0.00992305	0.00153771	0.00537321	0.00606616	0.00682479	0.00256825	0.00140521	0.00418662	0.0383402	0.000404941	0.000166753	0.000230971		2018-03-16	1h48	0.0113164	0.000545221	0.00124673	0.000188499	0.00645622	0.000428934	0.00740789	0.00145267	0.00641548	0.000696731	0.00442098	0.000143228	0.00477167	0.00140157	0.00457505	0.000475578	0.0381507	0.00338172	0.0003705	6.30141e-05	0.000131086	5.05115e-05	0.000223284	4.91994e-05
		t2-6	0.00491021	0.00123609	0.00716409	0.00932294	0.00583925	0.00397453	0.00492726	0.004044	0.0475306	0.000354974	0.000142179	0.000259856		2018-03-16	4h54	0.0125434	0.000502566	0.00135768	0.000105789	0.0071479	0.000233601	0.00719117	0.00136635	0.00652332	0.000654213	0.00434773	0.000194358	0.00318015	0.000969589	0.00557486	0.000296954	0.0390271	0.00245329	0.000673033	0.000182488	0.000164018	5.44486e-05	0.000480877	0.000163026
		t2-7	0.00961832	0.00121907	0.00526263	0.00752027	0.0117191	0.0041577	0.009068	0.00567958	-	0.000309023	7.43659e-05	0.000318813		2018-03-16	8h00	0.0117277	0.00211835	0.00116212	0.000222031	0.00872181	0.00166027	0.00879739	0.00206682	0.00774996	0.00131921	0.00566423	0.000431499	0.00166031	0.000527193	0.00563156	0.000530345	0.0493899	0.00877321	0.000893829	0.00022942	0.000481422	0.000160847	0.000750276	0.000177145
2018-03-15	1h00	t3-1	0.00562083	0.00131566	0.00180348	0.00194637	0.00205023	0.00161416	8.52422e-06	0.0014199	0.00854917	0.00018311	3.90315e-05	6.7255e-05		2018-03-16	11h06	0.00980845	0.00120593	0.00108101	6.73446e-05	0.00708376	0.000379746	0.006957	0.000687542	0.0065481	0.000633364	0.00500833	0.000437898	0.00208446	0.000583647	0.00424439	0.000368511	0.0312819	0.0020187	0.000603704	8.76113e-05	0.000213169	6.60049e-05	0.000268955	5.96474e-05
		t3-2	0.0120485	0.00122755	0.00846074	0.00820091	0.00770494	0.0061722	0.00358205	0.00535462	0.0366511	0.000914328	0.000283375	0.000404941		2018-03-16	14h12	0.0078967	0.000892674	0.00112283	0.000101387	0.00695815	0.000457239	0.00525303	0.000765632	0.00732214	0.000749886	0.00434986	0.00023948	0.00290756	0.00068531	0.0055801	0.000356739	0.0376641	0.00393739	0.000993841	0.000286829	0.000255508	6.88037e-05	0.000507034	0.000170739
		t3-3	0.00535462	0.00159746	0.00654677	0.00248938	0.00474295	0.00467765	0.00304361	0.00472654	0.0291573	0.000444663	0.000172633	0.000153977		2018-03-16	17h18	0.0120931	0.00152319	0.00104877	0.000108421	0.00739619	0.000698104	0.00797095	0.00130752	0.00816726	0.000155972	0.00416922	0.000470402	0.00221949	0.000762671	0.00508516	0.000243268	0.0442838	0.00924069	0.00110644	0.000378942	0.000389732	0.000257864	0.000883289	0.000361318
		t3-4	0.00654677	0.00199416	0.00282017	9.23152e-06	0.00374713	0.00192624	0.00297066	0.00149049	0.0144278	0.000198992	5.5008e-05	0.000162193
		t3-5	0.00916277	0.00162539	0.00517222	0.00531763	0.00506578	0.0026041	1.0243e-05	0.00385247	0.0288557	0.000443125	0.000139737	0.000248408
		t3-6	0.00484261	0.00158094	0.00550516	0.00583925	0.00456554	0.00467765	0.00132023	0.00428943	0.0532897	0.000609536	0.000209611	0.000324386
		t3-7	0.0111254	0.00132023	0.00628009	0.0118006	0.00985451	0.00414331	2.04152e-05	0.00654677	0.0459115	0.000347669	0.000227791	0.000141197
2018-03-15	4h06	t4-1	0.0103804	0.000740096	0.00414331	0.0024551	0.00403001	0.00342424	0.00229069	0.00405804	0.0191038	0.000307953	0.000328914	0.000124635
		t4-2	0.0216423	0.00144471	0.0112417	0.0126475	0.00739108	0.00636775	0.00136442	0.0073655	0.0459115	0.00282997	0.000793215	0.00269593
		t4-3	0.0122591	0.000923884	0.00696819	0.0106353	0.00480916	0.00389274	0.00239626	0.00562083	0.0463914	0.000387102	0.000232578	0.000287331
		t4-4	0.01612	0.00124038	0.00587987	0.00718897	0.00437955	0.002791	0.00190631	0.00369554	0.0194377	0.000251004	0.000142179	0.000188912
		t4-5	0.0106353	0.0017725	0.00630189	0.0044871	0.00347204	0.00472654	0.00480916	0.00537321	0.0363979	0.000315516	0.000156668	0.000189568
		t4-6	0.00942037	0.00152709	0.00594132	0.00728932	0.00716409	0.00491021	0.00721392	0.00600342	0.0345541	0.000580668	0.000289329	0.000248408
		t4-7	0.00955188	0.000877082	0.00650155	0.0065695	0.0073655	0.0034841	0.00127525	0.00619363	0.0473661	0.000498541	6.98684e-05	0.000284359
2018-03-15	7h12	t5-1	0.00872881	0.000474929	0.00567958	0.00373416	0.000441591	0.00269593	0.00535462	0.00281042	0.0235195	0.00115732	0.000700173	0.000434005
		t5-2	0.00469389	0.000963118	0.00526263	0.0056993	0.00237147	0.00293994	0.00191293	0.00397453	0.0322401	0.000898621	0.000498541	0.000592869
		t5-3	0.0102374	0.00120646	0.00731463	0.00728932	0.00668434	0.00398833	0.00286947	0.00544822	0.0334929	0.000289329	-	0.000233385
		t5-4	0.0106353	0.00106495	0.00454974	0.00659231	0.00369554	0.00264045	0.00127968	0.00265882	0.0178863	0.000333506	1.28928e-06	0.000248408
		t5-5	0.0149885	0.00292976	0.00882003	0.0120068	0.0109343	0.00692006	0.0066152	0.00680118	0.076415	0.00109489	0.000419221	0.000478233
		t5-6	0.0127355	0.00157547	0.00792156	0.0056993	0.00663816	0.00458139	0.00239626	0.00598265	0.0309268	0.000359929	6.7255e-05	0.000157758
		t5-7	0.0124303	0.00119813	0.00814426	0.0115978	0.0105253	0.00479252	0.00689612	0.00602426	0.0810525	0.000578659	5.78973e-07	0.000489976
2018-03-15	10h18	t6-1	0.00754638	0.000963118	0.00604518	0.00309681	0.00377319	0.00526263	1.04582e-05	0.00548611	0.0440413	0.000281418	0.000732441	4.77215e-05
		t6-2	0.00590028	0.00124901	0.00684848	0.00701666	0.0051365	0.00410046	1.97197e-05	0.00361948	0.0252951	0.000353746	0.000179965	0.000113896
		t6-3	0.00510101	0.00124901	0.00828662	0.00342424	0.0065695	0.00496153	0.00276214	0.00431926	0.0345541	0.000192881	0.000103721	0.000152384
		t6-4	0.0103087	0.00107795	0.00739108	0.0051454	0.00782605	0.00593104	0.00340649	0.00419388	0.0358347	0.000425811	9.20323e-05	0.000192547
		t6-5	0.00988872	0.00133402	0.00762525	-	0.0041577	0.00350833	0.00085606	0.00469389	0.023357	0.000182477	3.27079e-05	0.000110781
		t6-6	0.0101316	0.00130205	0.00752027	0.00992305	0.00628009	0.00469389	6.75787e-06	0.00437955	0.0405262	0.000391147	8.69171e-05	0.000239116
		t6-7	0.00575886	0.00119398	0.00831539	0.00668434	-	0.00389274	0.00571908	-	-	0.00042803	0.000303714	0.000361179
2018-03-15	13h24	t7-1	0.0104526	0.00106865	0.00638986	0.00734002	0.0105253	0.00487629	2.05572e-05	0.00610836	0.0332616	0.000333506	0.000278507	0.000260758
		t7-2	0.010202	0.000745244	0.00808801	0.00590028	0.00621513	0.0035573	0.00459729	0.00408627	0.0418102	0.000489976	0.000218512	0.000371333
		t7-3	0.0119653	0.00121486	0.00857885	0.0112807	0.0108399	0.00475942	0.00309681	0.00494436	0.0341967	0.000871024	0.000488281	0.000880127
		t7-4	0.0078125	0.000809882	0.00701666	0.00517222	0.00606616	0.00325078	0.000812694	0.00333061	0.0224833	0.000147704	8.99823e-05	9.54431e-05
		t7-5	0.0104164	0.000956465	0.0073655	0.00621513	0.00800435	0.00437955	0.00390625	0.00537321	0.0332616	0.000676323	0.000341696	0.000244141
		t7-6	0.0108587	0.00102867	0.00767829	0.00539186	0.00878952	0.00897421	2.44467e-05	0.00412898	0.03125	0.000345267	6.74884e-05	0.000148732
		t7-7	0.0195052	-	0.00888138	0.0106722	0.00825795	0.00711461	0.00922651	-	0.0614263	0.000375214	0.000134045	0.000210338
2018-03-15	16h30	t8-1	0.0123873	0.00161976	0.00951883	0.0052082	0.0112807	0.0033771	0.00283979	0.00762525	0.0483614	0.000267162	0.000161632	0.000180589
		t8-2	0.00955188	0.00109869	0.00575886	0.00765172	0.00554345	0.00276214	1.42864e-05	0.00542937	0.046714	0.000468391	0.000167332	0.000310095
		t8-3	0.0112028	0.00108356	0.00699238	0.00775854	0.00659231	0.00461325	0.00271468	0.00560139	0.0483614	0.00125335	0.000452436	0.000514336
		t8-4	0.0121323	0.00111403	0.00689612	0.00723897	0.00792156	0.00562083	1.9015e-05	0.00701666	0.041092	0.000603232	0.000118732	0.000363691
		t8-5	0.0127355	0.00128412	0.00592077	0.0103444	0.00878952	0.00376013	0.0055627	0.00510101	0.0326902	0.000256278	3.6642e-07	0.000236643
		t8-6	0.020546	0.00126206	0.00731463	0.00759887	0.0118006	0.00562083	0.010202	0.00645664	0.0347944	0.00214471	0.000821188	0.00109869
		t8-7	0.00831539	0.00115331	0.00699238	0.00628009	0.00775854	0.00834426	0.004534	0.00548611	0.03983	0.000300572	0.000156668	0.000287331
2018-03-15	19h36	t9-1	0.0137445	0.00110633	0.00806002	0.00820091	0.00659231	0.00325078	0.00741674	0.00608722	0.0343154	0.000238289	7.86061e-05	0.000169081
		t9-2	0.0134151	0.00168855	0.00721392	0.00327339	0.00383914	0.00423037	0.00201501	0.00567958	0.0309268	0.000637627	0.000154511	0.00040354
		t9-3	0.0119239	0.000824039	0.00659231	0.00405804	0.0061722	0.00412898	0.00197354	0.00461325	0.0409498	0.000628848	0.000231773	0.000258957
		t9-4	0.0130482	0.00118985	0.00663816	0.00822938	0.0100616	0.00571908	0.0056993	0.00602426	0.0445016	0.000895512	0.000404941	0.000624505
		t9-5	0.00539186	0.00128412	0.00968522	0.00757258	0.00636775	0.00558201	0.00244661	0.00464534	0.0446561	0.000384428	0.000238289	0.000299532
		t9-6	0.00485942	0.000717367	0.00652412	0.00464534	0.00229069	0.00319493	1.02253e-05	0.00311835	0.0259162	0.000399366	1.19304e-05	5.85488e-05
		t9-7	0.00511872	0.000695337	0.00699238	0.00961832	0.00606616	0.00494436	0.00333061	0.00491021	0.0679209	0.00160858	0.000886249	0.00137629
2018-03-15	22h42	t10-1	0.0126914	0.00131566	0.00789415	0.00431926	0.00786684	0.00377319	0.00170029	0.00706546	0.0492067	0.000514336	5.38759e-05	0.000248408
		t10-2	0.0119653	0.00108356	0.00587987	0.00548611	0.00592077	0.00654677	1.05675e-05	0.0043493	0.0337259	0.000755647	0.000199683	0.000578659
		t10-3	0.00567958	0.000963118	0.00654677	0.00647906	0.00515433	0.00471019	0.00378629	0.00364466	0.0307131	0.000364953	0.000119558	0.000300572
		t10-4	0.00533609	0.0011335	0.00817254	0.00806002	0.0123444	0.00544822	0.00843147	0.00526263	0.0300811	0.000412019	0.000125502	0.000167913
		t10-5	0.0114382	0.000979953	0.00539186	0.00615084	0.00604518	0.00492726	2.34509e-05	0.00444069	0.0419554	0.000397985	0.000146684	0.000166753
		t10-6	0.00477594	0.000553166	0.00454974	0.0033076	0.00430432	0.00414331	0.00192624	0.00199416	0.023357	0.000318813	5.33187e-05	8.84364e-05
		t10-7	0.00628009	0.00142482	0.00650155	0.00501338	0.00708999	0.00496153	0.00594132	0.00501338	0.0409498	0.000637627	4.94044e-05	0.000103362
2018-03-16	1h48	t11-1	0.0126475	0.00126206	0.00767829	0.00266805	0.00792156	0.00417213	0.0099575	0.00652412	0.042101	0.000478233	0.000346466	0.000392505
		t11-2	0.00988872	0.000829771	0.0051365	0.00849012	0.00610836	0.00508337	0.0042598	0.00427458	0.0386068	0.000470017	6.42921e-05	0.000225435
		t11-3	0.0118415	0.00142977	0.00645664	0.00916277	0.00479252	0.00420115	0.00280069	0.00387927	0.0415214	0.000502009	0.000113502	0.000305826
		t11-4	0.0115177	0.00205023	0.0073655	0.0127355	0.00900536	0.0044871	0.00708999	0.00508337	0.0435857	0.000193551	6.58709e-05	0.000128584
		t11-5	0.0125167	0.00109869	0.00680118	0.00677765	0.00583925	0.00417213	3.49342e-05	0.00458139	0.0415214	0.000155586	8.10323e-07	5.55829e-05
		t11-6	0.0094859	0.000809882	0.00529924	0.00461325	0.00482585	0.00441002	0.0044871	0.00310756	0.0215675	0.000423603	0.000195574	0.000231773
2018-03-16	4h54	t12-1	0.0128241	0.00154841	0.00792156	0.00885066	0.00888138	0.00484261	0.00552427	0.00699238	0.0289559	0.00100402	8.33104e-07	0.000688145
		t12-2	0.0130935	0.00160858	0.00645664	0.0125602	0.0044871	0.00412898	1.51534e-05	0.00564035	0.0475306	0.000452436	0.000105534	0.000368768
		t12-3	0.0136496	0.0016538	0.00789415	0.00575886	0.00711461	0.00405804	0.0030861	0.00511872	0.0423939	0.000468391	0.000238289	0.000275626
		t12-4	0.0139364	0.00116134	0.00708999	0.0102374	0.00849012	0.00494436	0.00482585	0.00615084	0.0454366	0.000588773	0.000203879	0.000435512
		t12-5	0.0103444	0.00126206	0.00744248	0.00303308	0.00634572	0.004044	0.0064343	0.00506578	0.0352801	0.000281418	0.000137813	0.000124635
		t12-6	0.0110869	0.000874048	0.00659231	0.00292976	0.00560139	0.00360696	0.00235509	0.00464534	0.0379436	0.000296434	3.37442e-05	0.000120808
		t12-7	0.0128686	0.0013955	0.00663816	0.00696819	0.00474295	0.00480916	2.02741e-05	0.00541058	0.0356489	0.00161976	0.00042803	0.00135265
2018-03-16	8h00	t13-1	0.00542937	0.0011335	0.00689612	0.00699238	0.00792156	0.00482585	0.00259509	0.00641204	0.0309268	0.000671651	0.000203174	0.000737535
		t13-2	0.0185814	0.00200109	0.0108212	0.0198461	0.0115577	0.00663816	1.55794e-05	-	0.0896222	0.000594927	0.000172036	0.000742665
		t13-3	0.019709	0.00193292	0.0179484	0.010202	0.0127797	0.00741674	0.00389274	0.00696819	0.0523742	0.00161976	0.000865007	0.00103583
		t13-4	0.0124734	0.00103942	0.00682479	0.00327339	0.00803214	0.00524442	0.00207166	0.00575886	0.0438889	0.00163669	0.00102867	0.00141009
		t13-5	0.0109722	0.000729907	0.00604518	0.00925854	0.00314004	0.00431926	1.61848e-05	0.00445611	0.0345541	0.0012577	0.000895512	0.00102157
		t13-6	0.00803214	0.000795969	0.00630189	0.00430432	0.00610836	0.00634572	0.00120229	0.00367001	0.0247745	0.000254508	3.70543e-05	7.56658e-05
		t13-7	0.00689612	0.000502009	0.00621513	0.00770494	0.00471019	0.00485942	0.00182866	0.00652412	0.0695889	0.000221562	0.000168496	0.000228582
2018-03-16	11h06	t14-1	0.0055627	0.000993633	0.00694408	0.00594132	0.00682479	0.00504825	4.05483e-05	0.00469389	0.0302903	0.000737535	0.000129031	0.000247549
		t14-2	0.0108964	0.00108733	0.00721392	0.0094859	0.00571908	0.00670754	0.0024551	0.00450268	0.0376815	0.000690534	0.000300572	0.000396608
		t14-3	0.0111254	0.00108356	0.00668434	0.00529924	0.00728932	0.00577886	0.00263132	0.00398833	0.0284584	0.000714886	0.000353746	0.000280444
		t14-4	0.00938778	0.00123609	0.00767829	0.00878952	0.00652412	0.00319493	0.00207885	0.00464534	0.0360214	0.000334664	5.59251e-07	0.000127254
		t14-5	0.0103444	0.000838443	0.00517222	0.00544822	0.00524442	0.00407213	0.00407213	0.0034841	0.0291573	0.000943297	0.00044931	0.000549345
		t14-6	0.0150405	0.000956465	0.00837323	0.00544822	0.00454974	0.00469389	1.71076e-05	0.00267731	0.022328	0.000313336	9.86523e-09	0.000118732
		t14-7	0.00630189	0.00137153	0.00752027	0.00828662	0.00968522	0.0055627	0.00329616	0.00571908	0.0350364	0.000491678	0.000258957	0.000162756
2018-03-16	14h12	t15-1	0.00575886	0.00101451	0.00728932	0.00311835	0.00427458	0.00431926	0.00206449	0.00577886	0.0350364	0.000345267	7.91528e-05	0.000204587
		t15-2	0.00638986	0.0010075	0.00872881	0.00396078	0.00882003	0.00374713	0.00278135	0.00602426	0.0561333	0.000853099	0.000534323	0.000576657
		t15-3	0.0120485	0.00165954	0.00699238	0.00837323	0.00752027	0.00474295	0.00542937	0.00503079	0.0310341	0.000844275	0.000380451	0.000584706
		t15-4	0.00945308	0.000979953	0.00471019	0.00699238	0.0066152	0.00356965	0.00254168	0.00390625	0.0226397	0.000295409	0.000191549	0.000130832
		t15-5	0.00630189	0.00129754	0.0066152	0.00537321	0.00938778	0.00397453	0.00492726	0.00522628	0.0365243	0.000503752	3.0412e-05	0.000112328
		t15-6	0.00913107	0.000886249	0.00682479	0.00299132	0.00541058	0.00475942	0.00258611	0.0066152	0.0431349	0.00202902	0.000192214	0.000525144
		t15-7	0.00619363	0.00101451	0.00754638	0.00596195	0.00922651	0.00533609	2.2652e-05	0.00647906	0.0391458	0.00208607	0.000380451	0.00141498
2018-03-16	17h18	t16-1	0.0128686	0.00135265	0.00696819	0.00860863	0.00846074	0.00374713	0.00271468	0.0056993	0.0446561	0.000514336	0.000217756	0.000239116
		t16-2	0.0136024	0.00105759	0.00708999	0.00958504	0.00822938	0.00524442	0.00214471	0.00564035	0.0573128	0.00211519	0.00141009	0.00189972
		t16-3	0.00606616	0.00115732	0.00942037	0.00778547	0.00765172	0.00450268	0.00155378	0.00464534	0.0367783	0.000671651	0.000195574	0.000493384
		t16-4	0.0136496	0.000692931	0.00524442	0.00312918	0.00849012	0.00255936	6.61879e-06	0.00458139	0.0142786	0.000304768	0.000123774	0.000181216
		t16-5	0.0142786	0.000983355	0.00825795	0.0107464	0.00800435	0.00479252	0.00467765	0.00485942	0.0683934	0.00192624	1.47077e-06	0.00160301

## Sheet: RowData 2.2 lab DD
Table Row Data 2.2: Gene expression in Crassostrea gigas gills into the laboratory under constant darkness (DD), expressed as relative expression. (A) Individual data (B) Mean ± Standard Error data. CT = circadian time, i.e. time (hour) after theorical light on.
A											B
CT (hours)	Samples	Clock	Bmal	Period	Tim1	Cry2	Cry1	Ror	Rev-erb		CT (hours)	Clock		Bmal		Period		Tim1		Cry2		Cry1		Ror		Rev-erb
7	rep1	0.000134045	0.000143665	0.000216252	0.000321031	0.000327776	0.000543663	3.7312e-05	0.000818347			Mean	SE	Mean	SE	Mean	SE	Mean	SE	Mean	SE	Mean	SE	Mean	SE	Mean	SE
	rep2	0.000122494	0.000151332	0.000940034	0.00134797	0.00085606	0.00247218	3.98517e-05	0.00121907		7	0.000499284	0.000146989	0.000104745	2.08236e-05	0.00201199	0.000485929	0.00214916	0.0005691	0.000593099	0.000112894	0.00289499	0.000676767	4.23625e-05	1.33004e-05	0.000844779	0.000113039
	rep3	0.000850147	0.000223878	0.00475942	0.00587987	0.000990195	0.00711461	0.000123346	0.00146997		9	0.00204146	0.000432237	3.74543e-05	1.09314e-05	0.0037901	0.000661648	0.00292144	0.000317296	0.000411574	8.11501e-05	0.00540754	0.00102933	1.4875e-05	5.77574e-06	0.000421353	9.56271e-05
	rep4	0.000140709	7.51431e-05	0.000705044	0.000889326	0.000302663	0.000798732	4.77215e-05	0.000745244		13	0.000980243	0.00014701	9.01354e-05	1.86599e-05	0.00206615	0.000350871	0.00230849	0.00031066	0.000568078	0.000144884	0.00405698	0.000769716	2.25257e-05	9.39545e-06	0.000539943	0.000104539
	rep5	0.000673983	3.69261e-05	0.00243815	0.00321715	0.000953156	0.00291963	2.10453e-07	0.00040354		17	0.000737355	0.000212583	6.8592e-05	1.31458e-05	0.00192141	0.000490643	0.00177246	0.000470816	0.000659748	0.000143845	0.00384018	0.000958765	1.52104e-05	3.62826e-06	0.000775391	0.000157109
	rep6	0.000332352	2.62013e-05	0.0016653	0.00108356	9.74485e-05	0.00414331	3.75715e-05	0.000447756		19	0.00268801	0.000407446	5.58942e-05	1.01033e-05	0.00456301	0.000569511	0.00310292	0.000337094	0.000455867	7.43577e-05	0.00575884	0.000610086	9.09641e-06	2.73801e-06	0.000576568	0.000114081
	rep7	0.000354974	6.51895e-05	0.00241293	0.00209331	0.000338161	0.00373416	1.21811e-05	0.000719858		23	0.0010049	0.000239703	6.6778e-05	1.85031e-05	0.00228806	0.000444365	0.00192292	0.000346656	0.000322217	6.32133e-05	0.0044117	0.000712741	8.12373e-06	3.38116e-06	0.00048765	0.00013327
	rep8	0.000414885	0.000104081	0.00137629	0.00138107	0.000570692	0.00123181	8.28006e-05	0.000832651		7	0.00126649	0.000412482	6.87202e-05	1.47773e-05	0.00304999	0.000843276	0.00282457	0.00091187	0.000443323	7.13237e-05	0.00729372	0.00194105	4.73299e-05	1.77022e-05	0.00068518	0.000104481
	rep9	0.00146997	0.000116289	0.00359448	0.00312918	0.000901741	0.00309681	2.67307e-07	0.000946572		9	0.00237828	0.000461094	2.00541e-05	8.27334e-06	0.00347985	0.000485815	0.00254822	0.000401859	0.000272786	0.000101877	0.00652597	0.00113715	1.71604e-06	6.95757e-07	0.000176598	8.29586e-05
9	rep1	0.000871024	4.1544e-05	0.0030861	0.00280069	0.000327776	0.00367001	4.81177e-06	0.000420677
	rep2	0.00273357	2.66593e-05	0.00477594	0.00378629	0.000229376	0.00708999	2.39436e-05	0.000198992
	rep3	0.00175416	1.5101e-05	0.0035573	0.00214471	0.000387102	0.00385247	1.44243e-07	0.000148732
	rep4	0.00492726	2.64189e-06	0.00851959	0.00482585	0.000865007	0.0128241	5.53467e-07	3.96293e-06
	rep5	0.00243815	5.339e-06	0.00360696	0.0030861	0.000229376	0.00445611	5.79748e-08	0.000312252
	rep6	0.00146488	4.78872e-05	0.00148533	0.00150607	0.000303714	0.00369554	4.22367e-07	0.000889326
	rep7	0.00237147	4.08303e-05	0.00360696	0.00272411	0.000755647	0.00497875	3.23696e-05	0.000549345
	rep8	0.000997082	0.000111939	0.00261314	0.00248938	0.000446207	0.0024213	4.54613e-05	0.000740096
	rep9	0.000815516	4.51473e-05	0.00285954	0.00292976	0.00015996	0.00567958	2.61107e-05	0.000528796
13	rep1	0.00132023	5.5008e-05	0.00194637	0.00286947	0.000824039	0.00765172	7.39509e-06	0.000700173
	rep2	0.000443125	0.000151332	0.00103942	0.00190631	0.00149566	0.00161976	7.4624e-05	0.000551252
	rep3	0.000673983	7.0111e-05	0.0013433	0.00142482	0.000750427	0.00233883	1.30728e-06	0.000406347
	rep4	0.000564789	3.09436e-05	0.00114138	0.00123609	0.000149766	0.00195312	2.28888e-05	0.000181216
	rep5	0.00162539	3.9905e-06	0.00378629	0.00389274	0.000269954	0.00718897	6.46015e-06	5.27672e-05
	rep6	0.000983355	0.000109256	0.00189972	0.00193292	0.000232578	0.00356965	5.71002e-07	0.000510784
	rep7	0.00105759	0.000114688	0.00212253	0.00229865	0.000727382	0.00338882	2.18047e-05	0.000549345
	rep8	0.000605326	9.77869e-05	0.00149049	0.00168271	0.000192881	0.00271468	6.51895e-05	0.000824039
	rep9	0.00154841	0.000178103	0.00382586	0.00353273	0.000470017	0.00608722	2.49073e-06	0.00108356
17	rep1	0.000446207	0.000123774	0.00106126	0.000671651	0.000626673	0.00237971	4.14003e-05	0.00141498
	rep2	0.000774203	1.8656e-05	0.00169441	0.000914328	0.000244988	0.00335377	1.20969e-05	0.000226218
	rep3	0.000667012	7.72557e-05	0.002791	0.00264045	0.00116537	0.0043644	1.46372e-05	0.00132941
	rep4	0.000509016	8.42479e-05	0.00155918	0.00232267	0.000525144	0.00335377	1.2437e-05	0.000582683
	rep5	0.000316611	1.62974e-05	0.000695337	0.000779588	7.3342e-05	0.000973184	1.0102e-05	0.000148217
	rep6	0.000782295	0.000114291	0.00254168	0.00191957	0.00126644	0.00744248	1.9995e-05	0.000859032
	rep7	0.000463546	3.1924e-05	0.00107608	0.00161976	0.000310095	0.00194637	2.78286e-06	0.000371333
	rep8	0.00237147	8.81304e-05	0.0052809	0.00485942	0.000611653	0.0094859	1.45866e-05	0.000889326
	rep9	0.000305826	6.27511e-05	0.000592869	0.000224655	0.00111403	0.00126206	8.85547e-06	0.00115732
19	rep1	0.00258611	9.67754e-05	0.0043493	0.00373416	0.000297463	0.00484261	2.70315e-05	0.000908013
	rep2	0.00298098	3.65441e-05	0.00401607	0.00229069	0.000311172	0.00394708	7.92587e-06	0.000419221
	rep3	0.00189314	6.10352e-05	0.00552427	0.00346003	0.000664704	0.00594132	9.01026e-06	0.000776891
	rep4	0.00188007	6.6329e-05	0.00280069	0.00281042	0.000557014	0.0043493	7.16799e-06	0.000603232
	rep5	0.00378629	3.7312e-05	0.00587987	0.00397453	0.000312252	0.00754638	1.58055e-08	0.000244141
	rep6	0.00248076	5.13242e-05	0.0042598	0.00312918	0.000574661	0.00673083	1.23084e-05	0.000615907
	rep7	0.00533609	0.000100885	0.00811609	0.00482585	0.000763545	0.00925854	1.3752e-05	0.00114138
	rep8	0.00177865	4.92335e-05	0.00298098	0.00200109	0.000562835	0.00550516	4.67024e-07	0.000468391
	rep9	0.00146997	3.60892e-06	0.00314004	0.00170029	5.91608e-05	0.00370837	4.18889e-06	1.19304e-05
23	rep1	0.000239946	0.000101235	0.000681027	0.00105393	0.000620191	0.00155378	1.13653e-05	0.000801505
	rep2	0.000930311	8.29113e-06	0.00248938	0.00222035	7.56658e-05	0.00544822	4.892e-08	2.90722e-05
	rep3	0.00026902	6.47392e-05	0.000596992	0.00117347	0.000419221	0.00123609	2.24956e-05	0.00056675
	rep4	0.00144973	3.20348e-05	0.00304361	0.00322832	0.000215504	0.00647906	7.49833e-06	0.000361179
	rep5	0.000509016	0.000149248	0.000667012	0.000712412	0.000489976	0.00230663	2.67519e-05	0.00104303
	rep6	0.00129306	0.000114291	0.00270529	0.00184138	0.000441591	0.00537321	5.11061e-07	0.000526967
	rep7	0.000438541	4.45853e-06	0.00374713	0.00119813	0.000168496	0.00694408	1.743e-06	1.62974e-05
	rep8	0.00237147	0.000117504	0.00405804	0.00379943	0.000368768	0.0052809	1.20873e-07	0.000976562
	rep9	0.00154305	9.19958e-06	0.0026041	0.00207885	0.000100536	0.00508337	2.57857e-06	6.74884e-05
7	rep1	0.000174438	2.85728e-05	0.000174438	0.000362433	0.000712412	0.000489976	0.000102648	0.00101451
	rep2	0.000370048	7.97034e-05	0.00111403	0.00149566	0.000383098	0.00789415	9.82576e-06	0.000712412
	rep3	0.000963118	2.33697e-05	0.00515433	0.00176637	0.000113502	0.0113986	5.762e-06	0.000178721
	rep4	0.000209611	0.000143665	0.0017725	0.00128412	0.000244988	0.00299132	9.14826e-07	0.000986769
	rep5	0.00227487	7.72557e-05	0.00564035	0.00437955	0.000642062	0.0182621	4.31584e-05	0.000719858
	rep6	0.00044931	0.000108501	0.000940034	0.00118985	0.00042803	0.00153771	2.9478e-05	0.000898621
	rep7	0.000774203	1.77724e-05	0.00192624	0.00120229	0.000235824	0.00377319	9.77094e-07	0.000198992
	rep8	0.00356965	0.000101939	0.00759887	0.00888138	0.000628848	0.0121323	0.000149248	0.000874048
	rep9	0.00261314	3.7702e-05	0.00312918	0.00485942	0.000601145	0.00716409	8.39564e-05	0.000582683
9	rep1	0.00187356	7.89844e-06	0.00315094	0.00114138	1.1564e-05	0.00373416	1.82332e-06	7.03544e-05
	rep2	0.00207885	8.58352e-06	0.00454974	0.00336541	8.36659e-05	0.0120485	6.78133e-06	7.75239e-05
	rep3	0.00189972	3.0412e-05	0.00316188	0.00168855	0.000214015	0.00360696	1.69533e-06	0.000224655
	rep4	0.00185418	6.876e-06	0.00378629	0.0035573	0.000171441	0.00919458	1.84877e-06	9.1873e-05
	rep5	0.00389274	5.782e-06	0.00396078	0.00309681	0.000108878	0.00638986	2.2999e-06	3.6041e-05
	rep6	0.00541058	9.26357e-06	0.00647906	0.00479252	0.000273722	0.0111254	1.21293e-07	0.000111939
	rep7	0.00122755	9.55707e-06	0.00207166	0.00164238	0.000140709	0.00421574	1.49329e-07	0.000150808
	rep8	0.002022	1.93139e-05	0.00253289	0.00173001	0.000429516	0.00519018	7.59697e-08	7.84389e-06
	rep9	0.00114535	8.28006e-05	0.00162539	0.00191957	0.00102157	0.00322832	6.49125e-07	0.000818347

## Sheet: RowData 2.3 lab LD
Table Row Data 2.3: Gene expression in Crassostrea gigas gills into the laboratory under light/dark alternation regimen 9h/15h, expressed as relative expression. (A) Individual data (B) Mean ± Standard Error data. ZT = zeitgeber time, i.e. time (hour) after light on.
A											B
ZT (hours)	Samples	Clock	Bmal	Per	Tim1	Cry2	Cry1	Ror	Rev-erb		ZT (hours)	Clock		Bmal		Per		Tim1		Cry2		Cry1		Ror		Rev-erb
0.5	rep1	0.00256825	0.000188912	0.00373416	0.00100054	0.00275258	-	0.00401607	0.00140035			Mean	SE	Mean	SE	Mean	SE	Mean	SE	Mean	SE	Mean	SE	Mean	SE	Mean	SE
	rep2	0.00183501	0.000288328	0.00255936	0.000523327	0.0016538	0.000747831	0.00405804	0.00100054		0.5	0.00226204	0.000289901	0.000297956	6.77124e-05	0.00318966	0.00041617	0.000658193	9.80653e-05	0.00273835	0.000557203	0.00141569	0.000429422	0.00427374	0.000597232	0.00112989	0.000112308
	rep3	0.00120229	0.000263483	0.00138586	0.000507255	0.00102867	0.000326642	0.00298098	0.000700173		4.5	0.0022403	0.000209519	0.000103433	2.36684e-05	0.0033229	0.00114061	0.000829023	0.00033658	0.000968738	0.000415644	0.00119758	0.000310426	0.00317815	0.00047968	0.00144406	0.000238248
	rep4	0.00301213	0.000495097	0.00401607	0.000895512	0.00237147	0.00212253	0.00485942	0.0010911		8.5	0.00237325	0.000349692	0.000215793	2.23225e-05	0.00420055	0.000498786	0.00105399	0.00018521	0.00508943	0.00148323	0.00151881	0.000371325	0.00707832	0.000953211	0.00340485	0.000401117
	rep5	0.00199416	7.03544e-05	0.00370837	0.000635421	0.00456554	0.00123181	0.00287943	0.00113744		12.5	0.00443399	0.000430249	0.000318168	6.7189e-05	0.0084053	0.000391055	0.0014798	0.000291132	0.00347865	0.000528143	0.00245131	0.000171978	0.00590585	0.000831209	0.00179432	0.000141065
	rep6	0.00296038	0.000481559	0.00373416	0.000387102	0.00405804	0.00264962	0.00684848	0.00144973		16.5	0.00387637	0.000475703	0.000300176	3.27519e-05	0.00735536	0.000820099	0.00182052	0.00033557	0.00599721	0.000685242	0.00213167	0.000433762	0.00499996	0.000658906	0.00146928	0.000240883
4.5	rep1	0.00262221	0.000129031	0.00641204	0.00130205	0.00101803	0.00222035	0.00471019	0.00224355		20.5	0.00355808	0.000395983	0.000277507	7.79714e-05	0.00769659	0.00105132	0.00197584	0.000429431	0.0033042	0.000808945	0.001732	0.000301581	0.00443215	0.000437638	0.00129803	0.000258438
	rep2	0.00173001	7.6722e-05	0.00223579	0.000734984	0.000303714	0.000953156	0.00241293	0.00122755		24.5	0.00285622	0.000210432	0.000257713	2.90091e-05	0.00555319	0.000330363	0.0011234	0.000259517	0.00318947	0.000528841	0.00118319	0.00024674	0.00361494	0.000455656	0.00121222	0.000150096
	rep3	0.00246363	0.000125502	0.000224655	0.000226218	0.00244661	0.000956465	0.00387927	0.000812694
	rep4	0.00173602	0.000160515	0.00227487	0.00184777	0.00101451	0.00148533	0.00222035	0.00162539
	rep5	0.00264962	2.53967e-05	0.00546713	3.40969e-05	6.0824e-05	0.000372622	0.00266805	0.00131111
8.5	rep1	0.00223579	0.000237465	0.0033076	0.00100402	0.00368275	0.00135265	0.00888138	0.00335377
	rep2	0.00124901	0.000233385	0.00322832	0.00133402	0.00243815	0.000395235	0.0067542	0.00433426
	rep3	0.00310756	0.000195574	0.00400218	0.00117755	0.00228277	0.00195312	0.00608722	0.00331908
	rep4	0.00312918	0.000140709	0.00596195	0.000363691	0.00985451	0.00262221	0.00945308	0.00401607
	rep5	0.00214471	0.000271831	0.00450268	0.00139067	0.00718897	0.00127084	0.00421574	0.00200109
12.5	rep1	0.00634572	0.000176261	0.00888138	0.000760903	0.00382586	0.00270529	0.00533609	0.00183501
	rep2	0.0043493	0.000190886	0.00860863	0.00111789	0.00154305	0.00202902	0.00820091	0.0021822
	rep3	0.00365731	0.000507255	0.00971884	0.00195991	0.0034841	0.00297066	0.00869861	0.00171806
	rep4	0.00331908	0.000264398	0.00699238	0.000667012	0.00299132	0.00242971	0.00441002	0.00138107
	rep5	0.00461325	0.00054555	0.00857885	0.00223579	0.00554345	0.00268661	0.00491021	0.00218978
	rep6	0.00431926	0.000224655	0.00765172	0.00213729	0.0034841	0.00188659	0.00387927	0.00145981
16.5	rep1	0.00379943	0.000388446	0.00503079	0.00151654	0.00554345	0.00323953	0.00759887	0.000790471
	rep2	0.00307542	0.000271831	0.00666121	0.00106495	0.00480916	0.00151129	0.00386585	0.00144973
	rep3	0.002791	0.000178721	0.00682479	0.00163103	0.0051365	0.00125335	0.00387927	0.00188007
	rep4	0.00606616	0.000277543	0.0105618	0.00103942	0.00762525	0.00369554	0.00359448	0.0017062
	rep5	0.00349619	0.000293368	0.0061722	0.00289946	0.00851959	0.00179724	0.00475942	0.00222035
	rep6	0.00403001	0.000391147	0.00888138	0.00277173	0.0043493	0.00129306	0.00630189	0.000768855
20.5	rep1	0.00235509	0.000152913	0.00573894	0.00242971	0.00379943	0.00171212	0.00312918	0.000838443
	rep2	0.00347204	0.000280444	0.00573894	0.00159746	0.000534323	0.000956465	0.00401607	0.000637627
	rep3	0.00462927	0.000555086	0.0104888	0.00343613	0.00472654	0.00278135	0.00573894	0.00209331
	rep5	0.00316188	0.000107752	0.00652412	0.00132481	0.00255051	0.00140035	0.00492726	0.0014199
	rep6	0.00417213	0.000291342	0.00999207	0.0010911	0.00491021	0.00180974	0.0043493	0.00150085
24.5	rep1	0.00334217	0.000285346	0.00519018	0.000898621	0.00237971	0.000596992	0.00360696	0.000871024
	rep2	0.00295014	0.000356206	0.00511872	0.000766195	0.00207166	0.000667012	0.00558201	0.00155918
	rep3	0.00256825	0.000198304	0.00433426	0.000889326	0.00544822	-	0.00393342	0.00141009
	rep4	0.0026041	0.000155048	0.00598265	0.00240458	0.00289946	0.00179102	0.00344806	0.000776891
	rep5	0.00352051	0.000281418	0.00623671	0.00102867	0.00236327	0.00167108	0.00259509	0.00102511
	rep6	0.00215216	0.000269954	0.00645664	0.000753033	0.00397453	0.00118985	0.00252413	0.00163103
